# Supplementary material
Source: PubMed Central journal article supplement (PMC4112555)
Supplement: NIHMS579667-supplement-supp_TableS1___Figure.pdf [file NIHMS579667-supplement-supp_TableS1___Figure.pdf]

**Supp. Table S1. All *MYH7* mutations associated with skeletal muscle myopathy**

| Exon | DNA variation*    | Codon change | Protein variation | Heptad position | Clinical Diagnosis  | Reference(s)                                                                |
|------|-------------------|--------------|-------------------|-----------------|---------------------|-----------------------------------------------------------------------------|
| 14   | c.1322C>T         | ACG>ATG      | p.Thr441Met       | N/A             | MPD1, HCM           | Darin et al, Neurology 2007                                                 |
| 16   | c.1816G>A         | GTG>ATG      | p.Val606Met       | N/A             | MPD1, HCM           | Overeem et al, Neuromusc Disord 2007                                        |
| 21   | c.2348G>C         | CGC>CCC      | p.Arg783Pro       | N/A             | MPD1, DCM           | Homayoun et al, Neuromusc Disord 2011                                       |
| 30   | c.4315G>C         | GCT>CCT      | p.Ala1439Pro      | a               | MPD1                | Park et al, Neuromusc Disord 2013                                           |
| 32   | c.4399C>G         | CTG>GTG      | p.Leu1467Val      | a               | Congenital myopathy | Cullup, Neuromusc Disord 2012                                               |
| 32   | c.4442T>C         | CTC>CCC      | p.Leu1481Pro      | a               | MPD1                | Current study                                                               |
| 32   | c.4499G>C         | CGG>CCG      | p.Arg1500Pro      | f               | MPD1                | Meredith et al, Am J Hum Genet 2004                                         |
| 33   | c.4522_4524delGAG | delGAG       | p.Glu1508del      | g               | MPD1                | Udd, Neuromusc Disord 2009<br>Dubourg et al, J Neurol 2011<br>Current Study |
| 33   | c.4622A>C         | CAG>CCG      | p.Gln1541Pro      | e               | MPD1                | Current study                                                               |
| 34   | c.4763G>C         | CGC>CCC      | p.Arg1588Pro      | b               | MPD1                | Cullup, Neuromusc Disord 2012                                               |
| 34   | c.4772T>C         | CTG>CCG      | p.Leu1591Pro      | e               | MPD1                | Tasca et al, Neuromusc Disord 2012                                          |

|    |                   |         |              |   |                                          |                                                                                 |
|----|-------------------|---------|--------------|---|------------------------------------------|---------------------------------------------------------------------------------|
| 34 | c.4790T>G         | CTG>CGG | p.Leu1597Arg | d | Axial myopathy,<br>Contractural myopathy | Clarke et al, Neuromusc Disord 2013                                             |
| 34 | c.4795A>C         | ACC>CCC | p.Thr1599Pro | f | MPD1                                     | Current study                                                                   |
| 34 | c.4807G>C         | GCA>CCA | p.Ala1603Pro | c | MPD1                                     | Udd, Neuromusc Disord 2009                                                      |
| 34 | c.4823G>C         | CGC>CCC | p.Arg1608Pro | a | Congenital myopathy,<br>Cardiomyopathy   | Current study                                                                   |
| 34 | c.4835T>C         | CTG>CCG | p.Leu1612Pro | e | MPD1                                     | Current Study                                                                   |
| 34 | c.4850_4852delAGA | delAAG  | p.Lys1617del | c | MPD1, DCM                                | Meredith et al, Am J Hum Genet 2004<br>Lamont et al, JNNP 2006<br>Current study |
| 34 | c.4906G>C         | GCC>CCC | p.Ala1636Pro | a | MPD1                                     | Current study                                                                   |
| 34 | c.4937T>C         | CTC>CCC | p.Leu1646Pro | d | MPD1                                     | Current study                                                                   |
| 35 | c.4985G>C         | CGT>CCT | p.Arg1662Pro | f | MPD1                                     | Current study                                                                   |
| 35 | c.4987G>C         | GCC>CCC | p.Ala1663Pro | g | MPD1                                     | Meredith et al, Am J Hum Genet 2004                                             |
| 35 | c.5005_5007delGAG | delGAG  | p.Glu1669del |   | MPD1                                     | Current study                                                                   |
| 35 | c.5117T>C         | CTG>CCG | p.Leu1706Pro | g | MPD1                                     | Meredith et al, Am J Hum Genet 2004                                             |
| 36 | c.5186_5188delAGA | delAAG  | p.Lys1729del | c | MPD1, DCM,<br>Scapuloperoneal myopathy   | Meredith et al, Am J Hum Genet 2004<br>Muelas et al, Neurology 2010             |
| 36 | c.5186_5188dupAGA | dupAAG  | p.Lys1729dup | c | MPD1                                     | Current study                                                                   |
| 37 | c.5336T>C         | CTG>CCG | p.Leu1779Pro | d | MSM                                      | Chai et al, Neuromusc Disord 2007                                               |
| 37 | c.5352_5354delGAA | delGAA  | p.Lys1784del | b | MPD1, MSM                                | Stalpers et al, Neuromusc Disord 2011<br>Tasca et al, Neuromusc Disord 2012     |

|    |                   |         |                  |     |                                |                                                                            |
|----|-------------------|---------|------------------|-----|--------------------------------|----------------------------------------------------------------------------|
|    |                   |         |                  |     |                                |                                                                            |
| 37 | c.5378_5380delTGC | delCTG  | p.Leu1793del     | d   | MPD1, DCM                      | Current study                                                              |
| 37 | c.5378T>C         | CTG>CCG | p.Leu1793Pro     | d   | MPD1, MSM, HCM                 | Dye et al, Neuromusc Disord 2006<br>Uro-Coste et al, Neuromusc Disord 2009 |
| 37 | c.5401G>A         | GAG>AAG | p.Glu1801Lys     | e   | MPD1, DCM, HCM                 | Udd, Neuromusc Disord 2009<br>Current study                                |
| 37 | c.5533C>T         | CGG>TGG | p.Arg1845Trp     | f   | MSM                            | Tajsharghi et al, Ann Neurol 2003<br>Pegoraro et al, Neuromusc Disord 2007 |
| 38 | c.5566G>A         | GAG>AAG | p.Glu1856Lys     | c   | MPD1, Cardiomyopathy           | Udd, Neuromusc Disord 2009                                                 |
| 38 | c.5647G>A         | GAG>AAG | p.Glu1883Lys     | b   | MSM, HCM                       | Tajsharghi et al, Neurology 2007                                           |
| 39 | c.5702A>T         | CAC>CTC | p.His1901Leu     | f   | MSM                            | Bohlega et al, Neurol 2004                                                 |
| 39 | c.5740G>A         | GAG>AAG | p.Glu1914Lys     | e   | DCM, Congenital myopathy       | Current study                                                              |
| 40 | c.5807A>G         | TAG>TGG | p.*1936Trpext*31 | N/A | Proximal myopathy with<br>CFTD | Ortolano et al, Neuromusc Disord 2011                                      |

All *MYH7* mutations associated with a defined skeletal myopathy, with or without cardiomyopathy. All mutations are heterozygous dominant except p.Glu1883Lys which is recessive.

\**MYH7* cDNA Accession number used = NM\_000257.2. DNA variation is given according to the Human Genome Variation Society notation as obtained from Mutalyzer (<https://mutalyzer.nl>)

CFTD = congenital fibre type disproportion, DCM = dilated cardiomyopathy, HCM = hypertrophic cardiomyopathy, MPD1 = distal myopathy type 1, MSM = Myosin storage myopathy

**Supp. Figure S1**

*Family 1:p.Leu1481Pro*

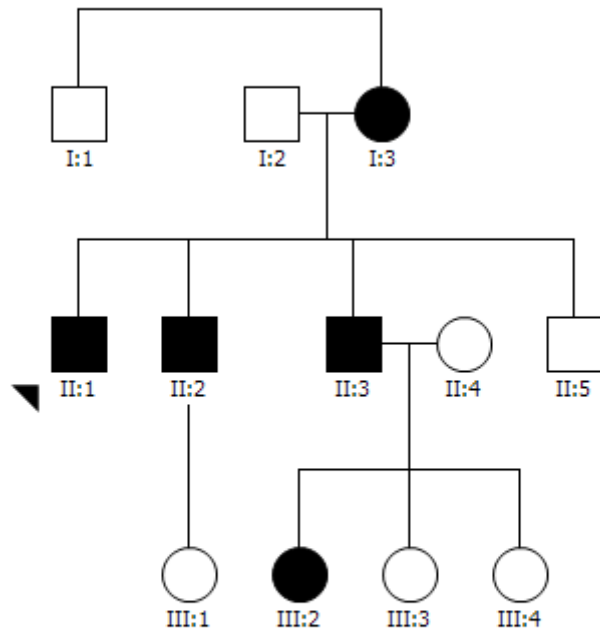

*Family 2:p.Glu1508del*

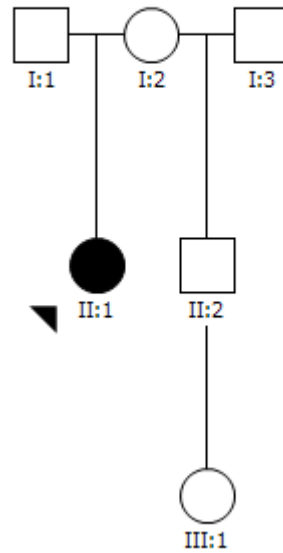

*Family 4:p.Gln1541Pro*

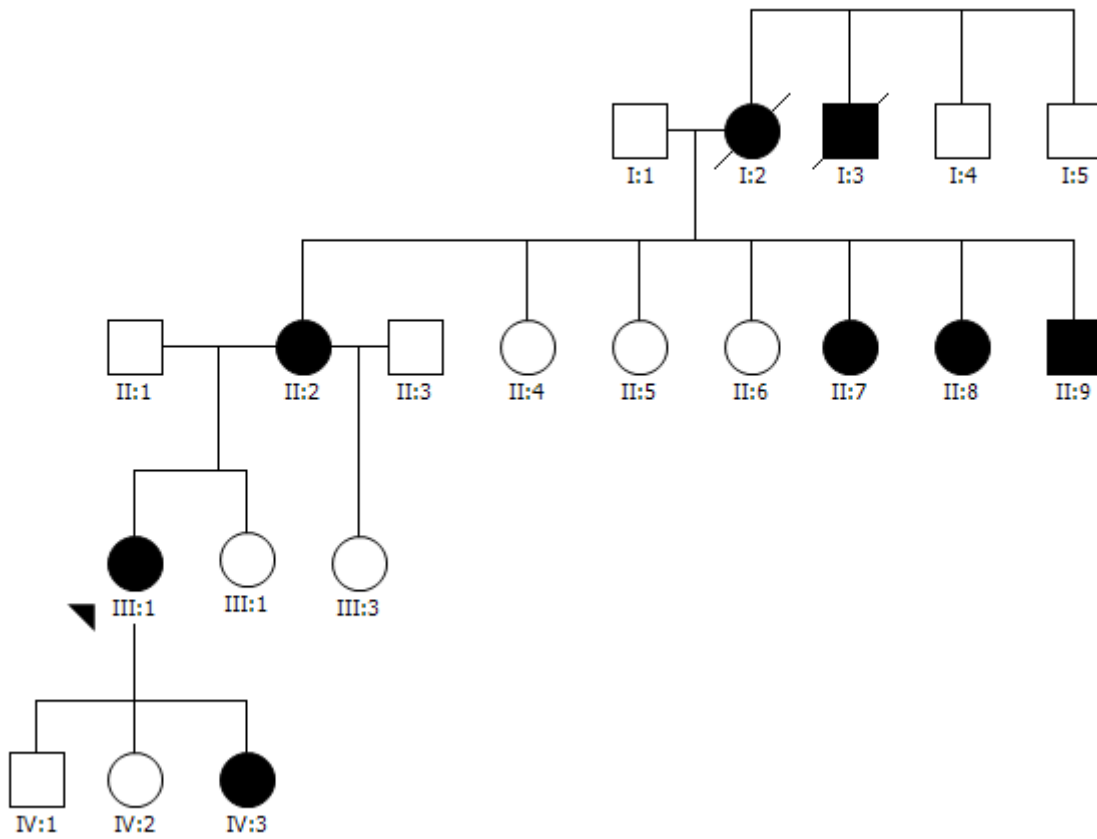

*Family 6:p.Arg1608Pro*

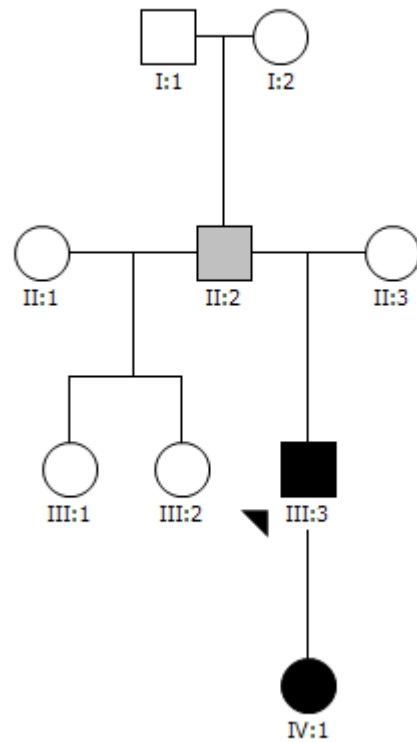

*Family 5:p.Thr1599Pro*

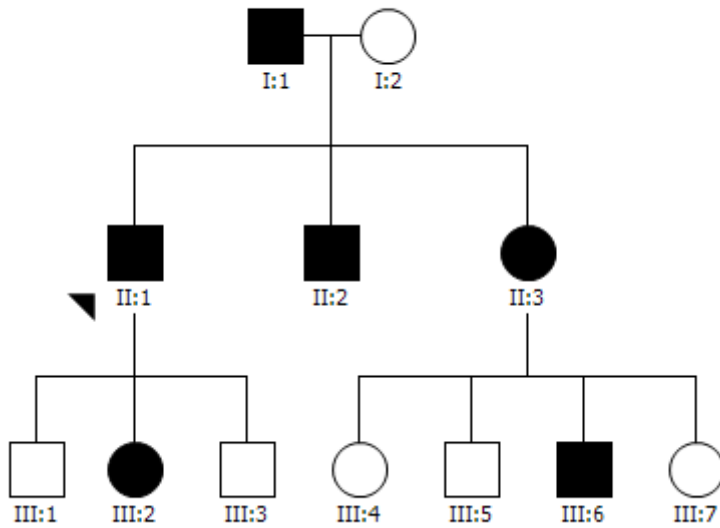

*Family 9:p.Lys1617del*

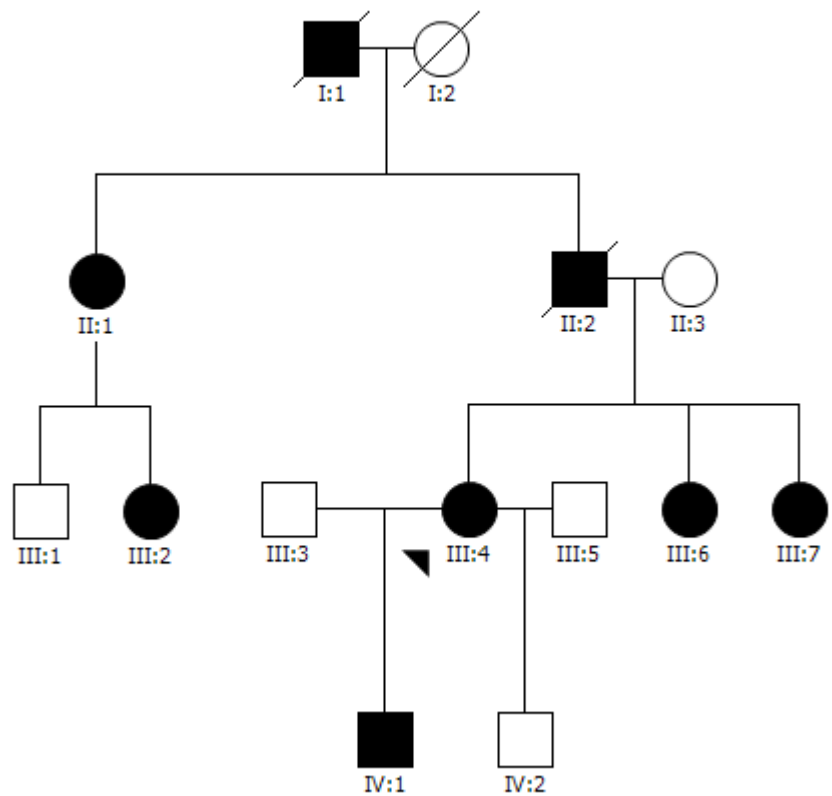

*Family 7:p.Leu1612Pro*

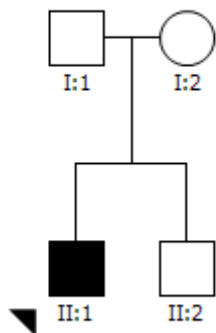

*Family 10:p.Lys1617del*

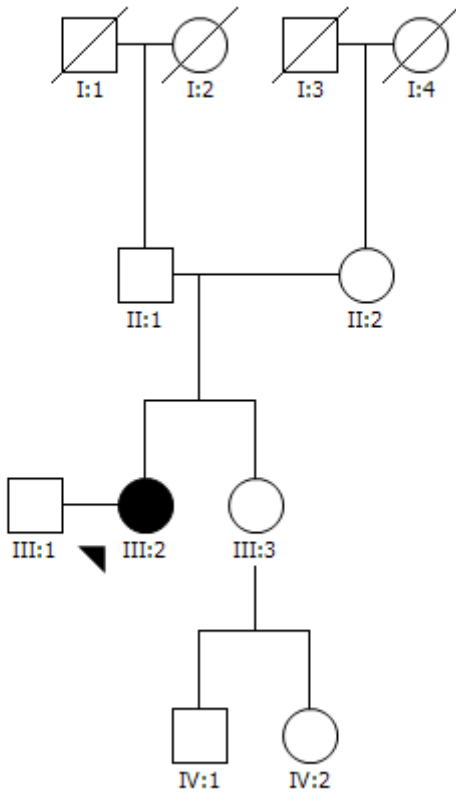

*Family 11:p.Lys1617del*

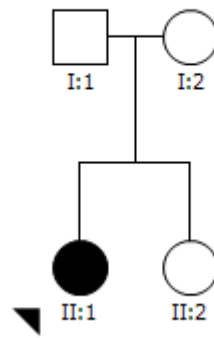

*Family 12:p.Lys1517del*

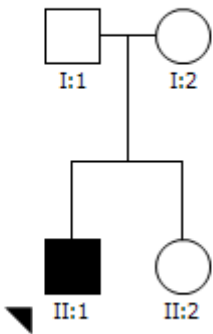

*Family 13:p.Ala1636Pro*

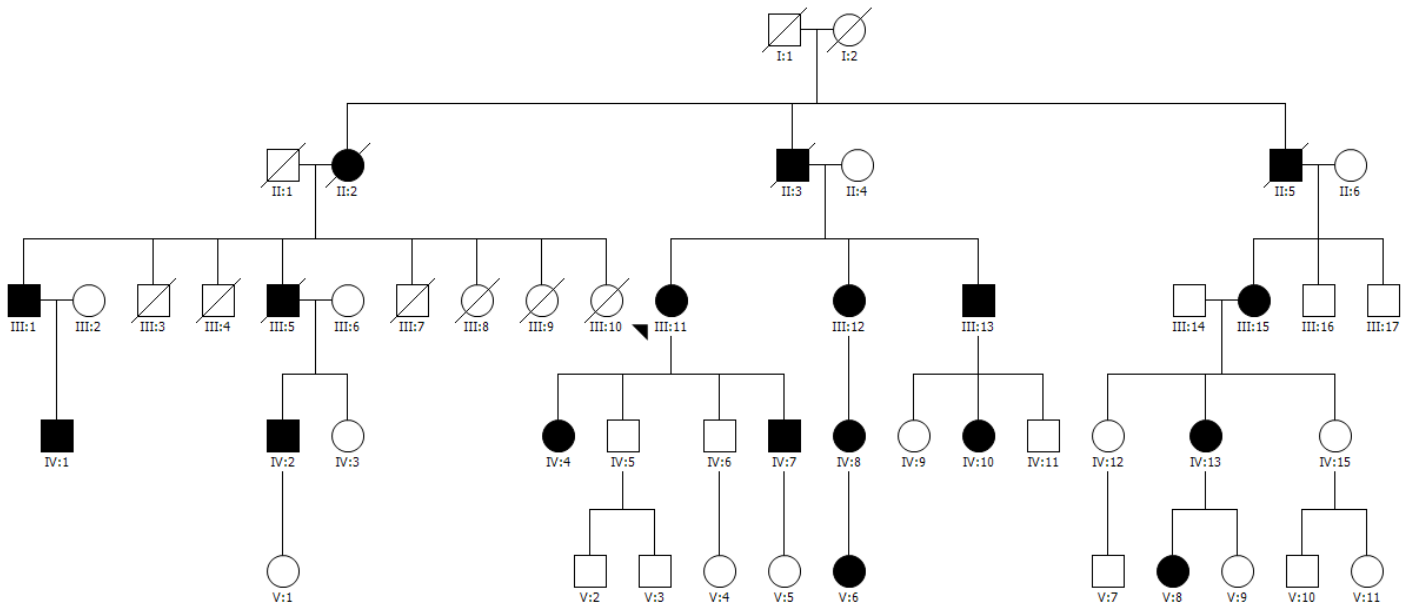

*Family 15:p.Arg1662Pro*

*Family 14:p.Leu1646Pro*

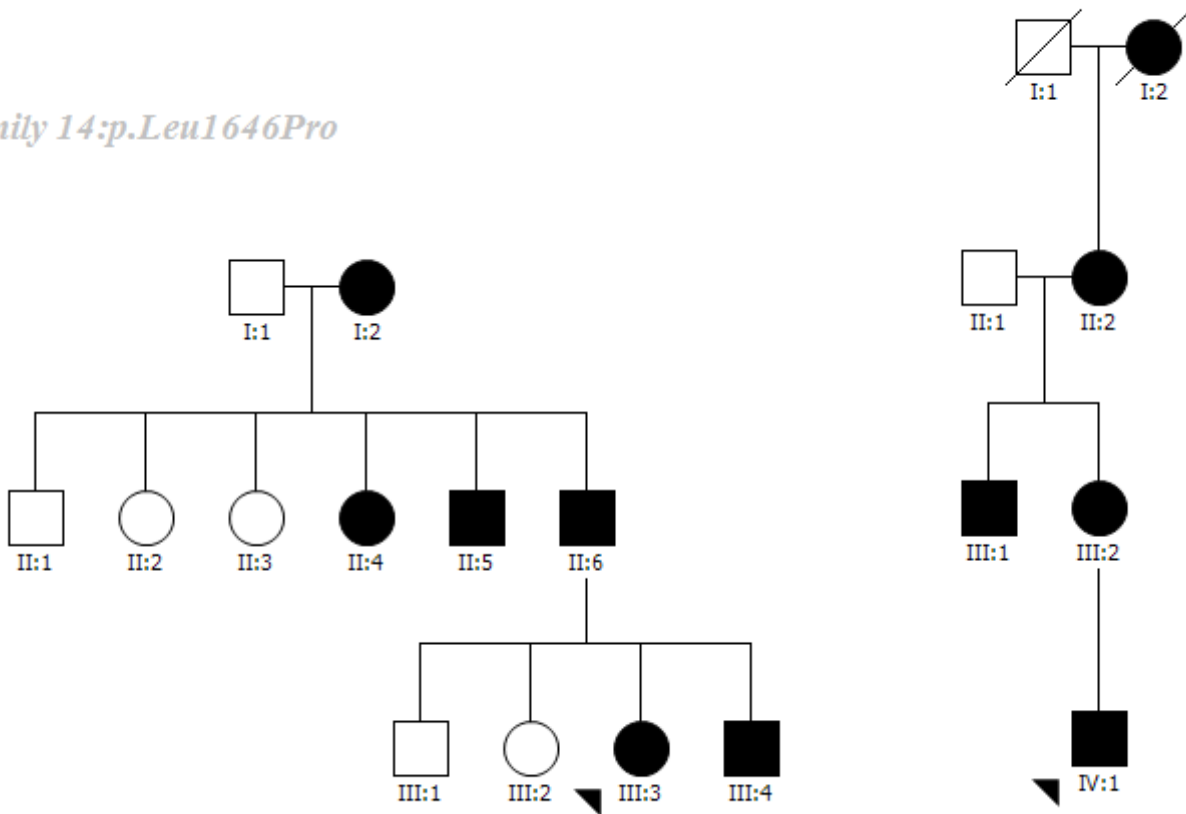

*Family 16:p.Glu1669del*

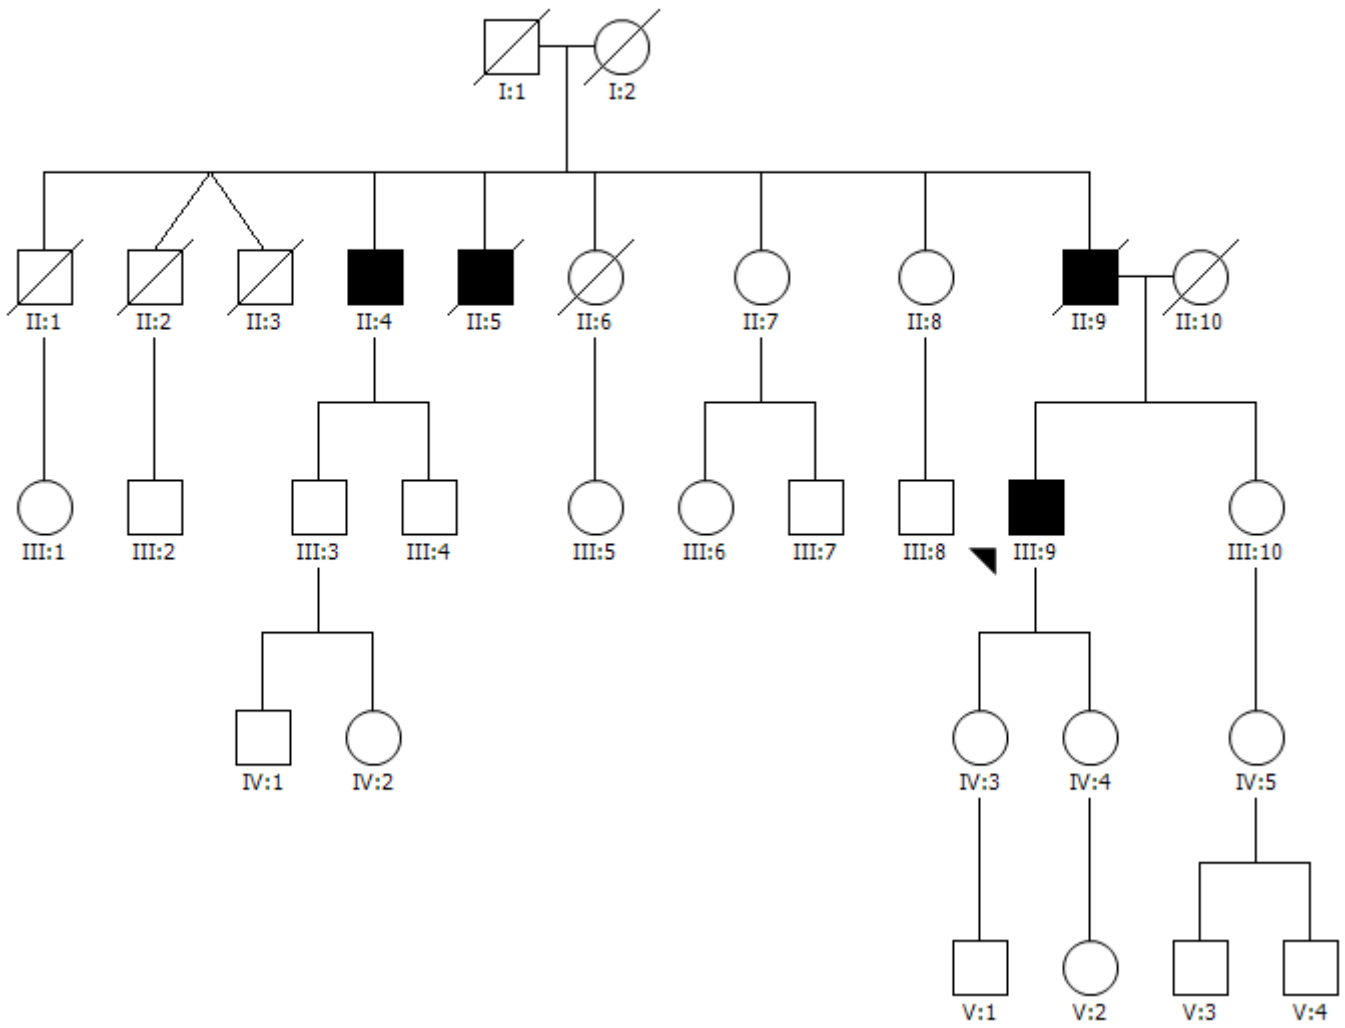



*Family 17:p.Lys1729dup*

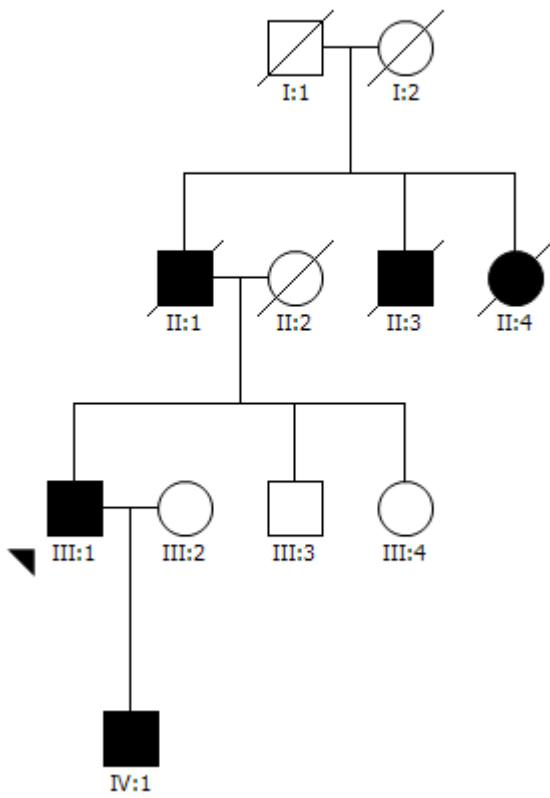

*Family 18:p.Leu1739del*

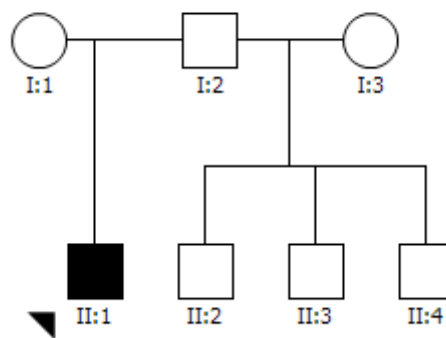

*Family 19:p.Glu1801Lys*

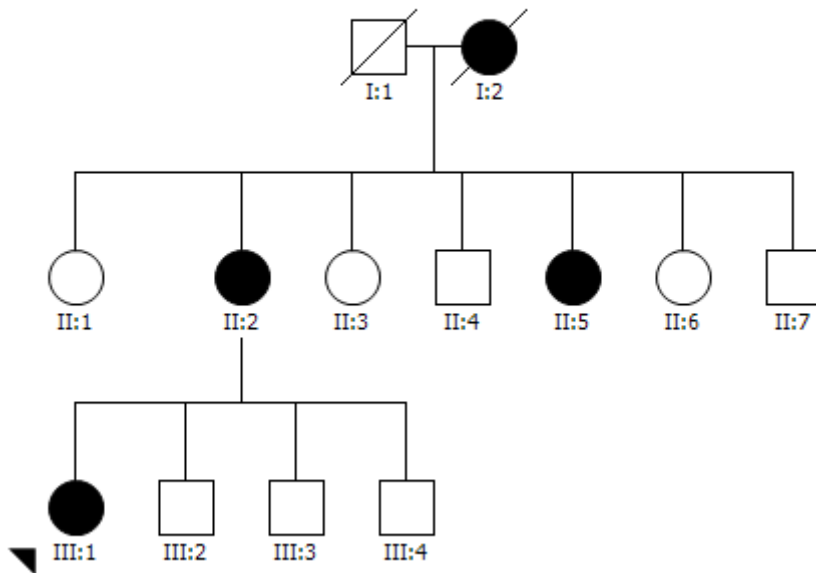

*Family 20:p.Glu1914Lys*

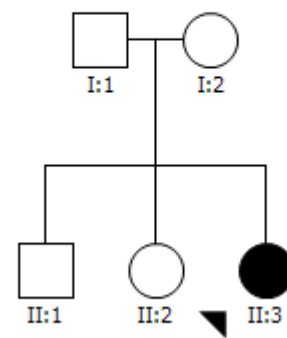

*Family 21:p.Glu1914Lys*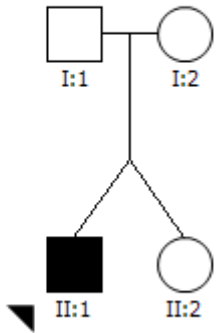

**Supp. Figure S1.** Pedigrees for all families, except family 8 which was archival and detailed information was not available.

Black Symbol: Affected individual clinically.

Grey symbol in family 6: Somatic mosaic for *MYH7* mutation, minimally affected clinically.
